# Supplementary material for: PLGA nanoparticles modified with a BBB-penetrating peptide co-delivering Aβ generation inhibitor and curcumin attenuate memory deficits and neuropathology in Alzheimer's disease mice
Source: PubMed Central journal article supplement (PMC5655257; doi:10.18632/oncotarget.20944), 2017-09-15
Supplement: oncotarget-08-81001-s001.pdf [file oncotarget-08-81001-s001.pdf]

# PLGA nanoparticles modified with a BBB-penetrating peptide co-delivering A $\beta$ generation inhibitor and curcumin attenuate memory deficits and neuropathology in Alzheimer's disease mice

## SUPPLEMENTARY MATERIALS

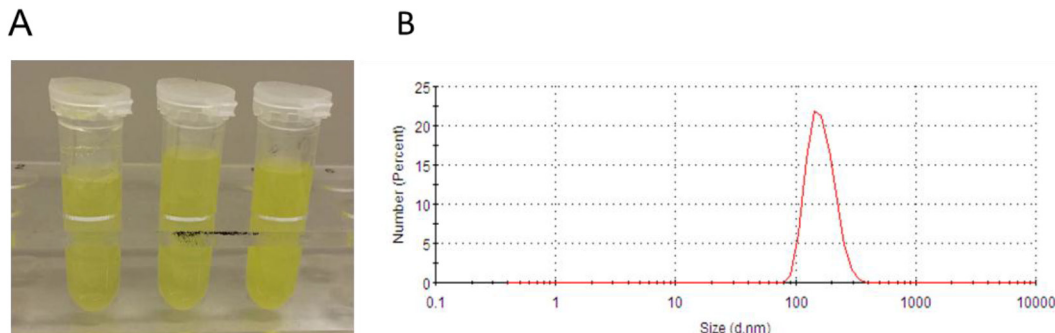

**Supplementary Figure 1: Stability of PLGA nanoparticles.** CRT-NP-S1-Cur NPs were kept in PBS buffer at 4 °C for 3 weeks and then the aggregation (A) and particle sizes (B) were measured.

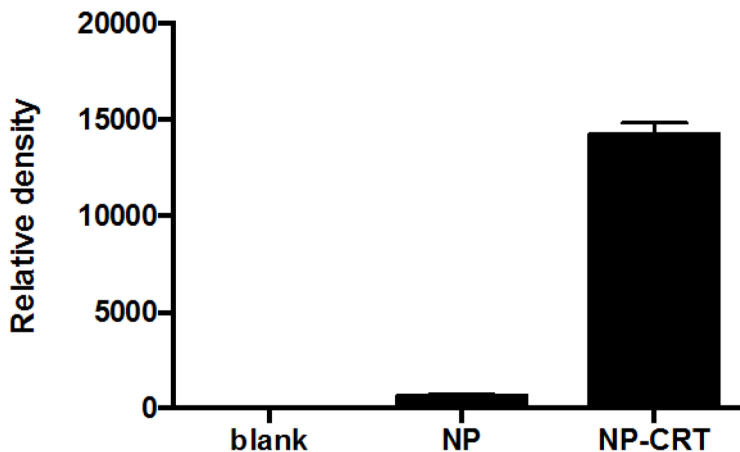

**Supplementary Figure 2: Quantification of the fluorescence levels of coumarin-6-labeled PLGA NP control, NP-S1+Cur and CRT-NP-S1+Cur in bEnd.3 cells.**

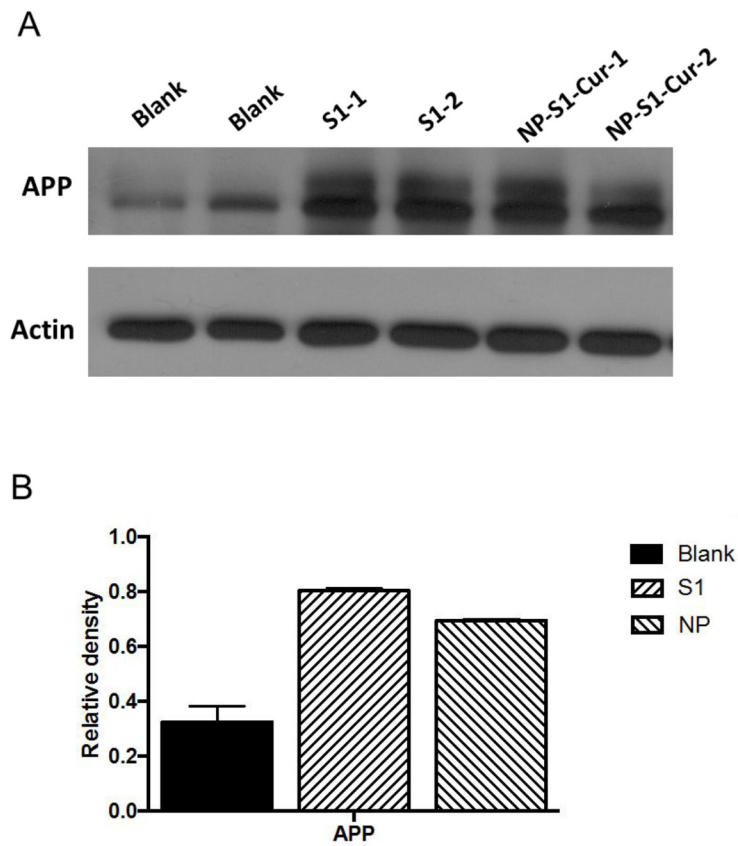

**Supplementary Figure 3: S1 peptide and S1 loaded NPs reduced APP cleavage.** (A) NP, S1 peptide and NP-S1-Cur was added to 7PA2 cell culture. Cells were collected APP level in cell culture media were analyzed by western blot using the anti-C-terminal of the APP antibody. Actin was used as a loading control. (B) Quantification of the western blot using ImageQuant Software.
